# Supplementary material for: CHILD-BRIGHT READYorNot Brain-Based Disabilities Trial: protocol of a randomised controlled trial (RCT) investigating the effectiveness of a patient-facing e-health intervention designed to enhance healthcare transition readiness in youth
Source: PubMed Central journal article supplement — BMJ Open. 2021 Mar 26;11(3):e048756. doi: 10.1136/bmjopen-2021-048756 (PMC8006854; doi:10.1136/bmjopen-2021-048756), 2021-03-26
Supplement: bmjopen-2021-048756supp004.pdf [file bmjopen-2021-048756supp004.pdf]

**Supplementary File 4: Outline of E-Learning Training Modules for Research Staff**

| <b>Name of Module</b>                            | <b>Summary of Content in the Module</b>                                                                                                                                                                                                 |
|--------------------------------------------------|-----------------------------------------------------------------------------------------------------------------------------------------------------------------------------------------------------------------------------------------|
| Introduction and Team                            | Highlights the core team, core staff, patient and family advisory council (PFAC), recruitment sites, and funding.                                                                                                                       |
| Study Summary                                    | A high-level overview of the study including purpose, objectives, study design, and expected outcomes.                                                                                                                                  |
| Patient Engagement                               | Explains patient-oriented research, how patient and family engagement is incorporated into the study and refers research staff to the Patient-Oriented Research Curriculum in Child Health (PORCCH).                                    |
| RA Responsibilities and Training                 | Reviews responsibilities of the RA regarding training, communication, administration and maintaining confidentiality.                                                                                                                   |
| Study Assessment Procedures                      | Explains the various ways that study assessments can be completed including how to set up a zoom meeting call.                                                                                                                          |
| Screening Interview                              | Reviews recruitment and all the steps required to complete the screening interview to determine if a potential participant is eligible for the study. Includes how to access and use instruments in REDCap.                             |
| Consent, Assent and Preparing for Baseline Visit | Reviews the verbal consenting and assenting process in REDCap and the Eligibility and Consent/Assent Status form. Information on completion methods for study measures and how to send them to the study participants is also included. |
| Study Measures                                   | Reviews all the study measures for parent/caregiver, youth and those to be completed by the RA with the youth, for both baseline and follow-up visits. Videos on how to administer the COPM and NVS are included.                       |
| Randomization                                    | Step by step information on how to run randomization in REDCap and information and videos of what it means to be in the control group or intervention group.                                                                            |
| Concluding the Baseline Visit                    | Reviews participant appreciation, handout materials for youth and parent/caregiver, and information on the follow-up visit.                                                                                                             |
| MyREADY Transition™ BBD App                      | Detailed information on the creation of the App, who it is designed for, how to access it, and an overview of the app itself. Information is also provided about the technical support website.                                         |
| Follow-Up Visit                                  | Reviews participant appreciation, and procedure for the follow-up visit after 6 months.                                                                                                                                                 |
| Information and Resources                        | Shows where to access other study documents and resources (e.g. in the File Repository in REDCap)                                                                                                                                       |
| Contact Information                              | Contact information for RCT coordinators for ongoing support, to answer questions or if more information is required.                                                                                                                   |
