# Supplementary material for: CHILD-BRIGHT READYorNot Brain-Based Disabilities Trial: protocol of a randomised controlled trial (RCT) investigating the effectiveness of a patient-facing e-health intervention designed to enhance healthcare transition readiness in youth
Source: PubMed Central journal article supplement — BMJ Open. 2021 Mar 26;11(3):e048756. doi: 10.1136/bmjopen-2021-048756 (PMC8006854; doi:10.1136/bmjopen-2021-048756), 2021-03-26
Supplement: bmjopen-2021-048756supp005.pdf [file bmjopen-2021-048756supp005.pdf]

## Supplementary File 5: Study Objectives, Outcomes, Hypotheses and Analysis Methods

| Objective                                                                                                                               | Outcome                                                                                                                                                                                                                                                      | Hypothesis                                                                                                                                                    | Method of Analysis                                                                                                                                                                         |
|-----------------------------------------------------------------------------------------------------------------------------------------|--------------------------------------------------------------------------------------------------------------------------------------------------------------------------------------------------------------------------------------------------------------|---------------------------------------------------------------------------------------------------------------------------------------------------------------|--------------------------------------------------------------------------------------------------------------------------------------------------------------------------------------------|
| <b>Primary:</b><br>To determine whether the MyREADY Transition™ BBD App intervention will result in improved transition readiness       | <b>Primary:</b><br><ul style="list-style-type: none"> <li>Change in TRAQ self-management score from Baseline to 6 months.</li> </ul>                                                                                                                         | Intervention > Control                                                                                                                                        | ANCOVA                                                                                                                                                                                     |
|                                                                                                                                         | <b>Secondary:</b><br><ul style="list-style-type: none"> <li>Change in TRAQ self-advocacy score from Baseline to 6 months.</li> </ul>                                                                                                                         | Intervention > Control                                                                                                                                        | ANCOVA                                                                                                                                                                                     |
|                                                                                                                                         | <b>Secondary</b><br><ul style="list-style-type: none"> <li>Health care transition experience</li> </ul>                                                                                                                                                      | Individual semi-structured interviews                                                                                                                         | Qualitative Methods                                                                                                                                                                        |
| <b>Secondary:</b><br>What is the effect of the MyREADY Transition™ BBD App intervention for improving health and use of health systems? | <b>Primary:</b><br><b>Population Health</b><br><ul style="list-style-type: none"> <li>Serious illness (hospitalizations, ICU admission questions from Resource Use Questionnaire</li> <li>PedsQL™ Pediatric Quality of Life</li> <li>TRANSITION-Q</li> </ul> | Intervention > Control                                                                                                                                        | ANCOVA for continuous outcomes<br><br>Logistic regression for hospitalization                                                                                                              |
|                                                                                                                                         | <b>Secondary:</b><br><ul style="list-style-type: none"> <li>Utilization MyREADY Transition™ BBD App</li> </ul>                                                                                                                                               | User metrics built into MyREADY Transition™ BBD App intervention to assess the extent to which various components of the intervention are accessed            | Descriptive                                                                                                                                                                                |
|                                                                                                                                         | <b>Secondary:</b><br><b>Cost utility/cost-effectiveness</b><br><ul style="list-style-type: none"> <li>Health Utilities Index® (Hui2/3)</li> <li>Resource Use Questionnaire</li> </ul>                                                                        | Evaluate changes in patients' health in relation to changes in cost to assess if the intervention represents an efficient allocation of health care resources | Descriptive.<br>Cost-effectiveness analysis with support from Child-Bright health economics network team                                                                                   |
|                                                                                                                                         | <b>Secondary:</b><br><ul style="list-style-type: none"> <li>Achievement of health/life goals</li> <li>COPM</li> </ul>                                                                                                                                        | Intervention > Control                                                                                                                                        | Paired Student t-tests to compare mean ratings for performance and satisfaction on the COPM scoring system (10-point scale) with > 2 points difference as clinically meaningful difference |

ANCOVA: Analysis of covariance

COPM: Canadian Occupational Performance Measure

HUI: Health Utilities Index®

ICU: Intensive Care Unit

TRAQ: Transition Readiness Assessment Questionnaire
