# Supplementary material for: CHILD-BRIGHT READYorNot Brain-Based Disabilities Trial: protocol of a randomised controlled trial (RCT) investigating the effectiveness of a patient-facing e-health intervention designed to enhance healthcare transition readiness in youth
Source: PubMed Central journal article supplement — BMJ Open. 2021 Mar 26;11(3):e048756. doi: 10.1136/bmjopen-2021-048756 (PMC8006854; doi:10.1136/bmjopen-2021-048756), 2021-03-26
Supplement: bmjopen-2021-048756supp006.pdf [file bmjopen-2021-048756supp006.pdf]

**Supplementary File 6: List of Recruitment Sites in Alberta, Ontario, Quebec, and the Maritimes.**

Centre Hospitalier Universitaire (CHU) Sainte-Justine, Montreal, Quebec

Children's Hospital of Eastern Ontario (CHEO), Ottawa, Ontario

Glenrose Rehabilitation Hospital/Stollery Children's Hospital, Edmonton, Alberta

Holland Bloorview Kids Rehabilitation Hospital, Toronto, Ontario

IWK Health Centre, Halifax, Nova Scotia

McMaster Children's Hospital, Hamilton, Ontario

Montreal Children's Hospital, Montreal, Quebec

Saint John Regional Hospital Department of Pediatrics, Saint John, New Brunswick

St. Joseph's Health Care London/Children's Hospital London Health Sciences Centre, London, Ontario
