# Supplementary figures and images for: CHILD-BRIGHT READYorNot Brain-Based Disabilities Trial: protocol of a randomised controlled trial (RCT) investigating the effectiveness of a patient-facing e-health intervention designed to enhance healthcare transition readiness in youth
Source: PubMed Central journal article supplement — BMJ Open. 2021 Mar 26;11(3):e048756. doi: 10.1136/bmjopen-2021-048756 (PMC8006854; doi:10.1136/bmjopen-2021-048756), 2021-03-26

**Supplementary File 3: Recruitment Approach**

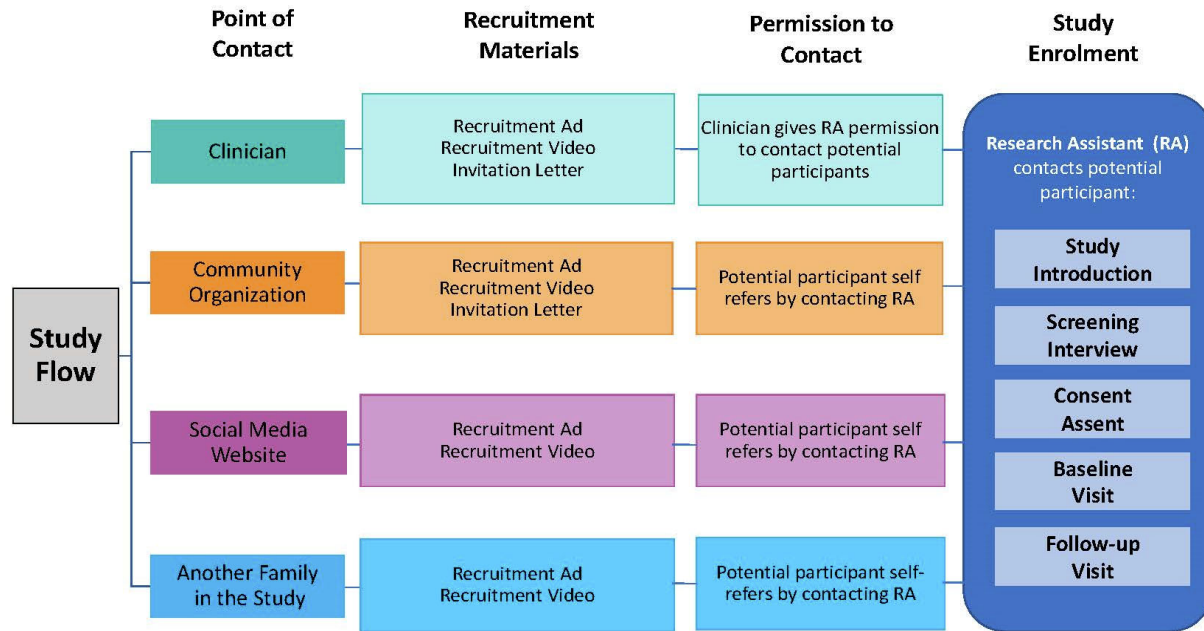

Supplement: bmjopen-2021-048756supp003.pdf [file bmjopen-2021-048756supp003.pdf]
